# Supplementary material for: Sonochemical reaction to control the near-infrared photoluminescence properties of single-walled carbon nanotubes
Source: Royal Society of Chemistry journal article supplement (doi:10.1039/d0nr00271b), 2020-01-01
Supplement: d0nr00271b1.pdf [file d0nr00271b1.pdf]

**Electronic supplementary information**

**Sonochemical reaction to control the near-infrared photoluminescence properties of single-walled carbon nanotubes**

Yutaka Maeda,<sup>a\*</sup> Yui Konno,<sup>a</sup> Akane Nishino,<sup>a</sup> Michio Yamada,<sup>a</sup> Saki Okudaira,<sup>b</sup> Yuhei Miyauchi,<sup>b</sup> Kazunari Matsuda,<sup>b</sup> Jun Matsui,<sup>c</sup> Masaya Mitsuishi<sup>d</sup>, and Mitsuaki Suzuki<sup>e</sup>

<sup>a</sup> Department of Chemistry, Tokyo Gakugei University, Koganei, Tokyo 184-8501, Japan

<sup>b</sup> Institute of Advanced Energy, Kyoto University, Uji, Kyoto 611-0011, Japan

<sup>c</sup> Faculty of Science, Yamagata University, Yamagata 990-8560, Japan

<sup>d</sup> Institute of Multidisciplinary Research for Advanced Materials (IMRAM), Tohoku University, Sendai 980-8577, Japan

<sup>e</sup> Department of Chemistry, Josai University, Saitama 350-0295, Japan

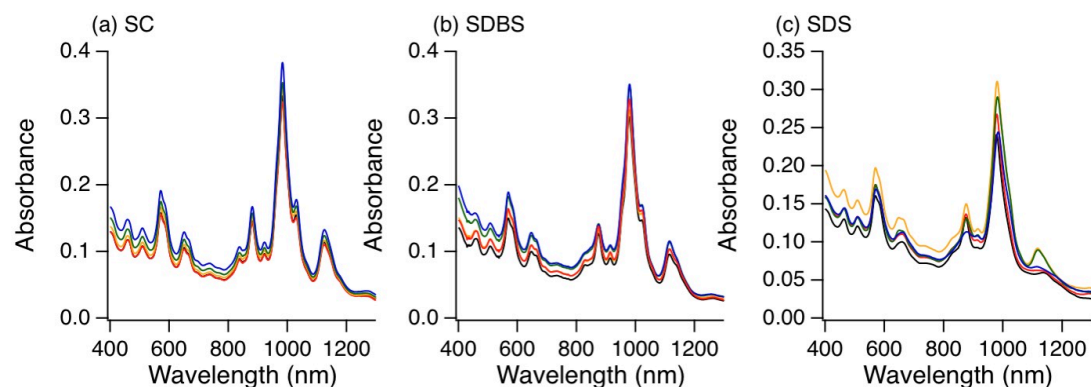

**Figure S1.** Absorption spectra of single-walled carbon nanotubes (SWNTs; 0.0125 g/L) dispersed in a D<sub>2</sub>O solution containing 1 wt% surfactant: (a) SC, (b) SDBS, (c) SDS. Sonication time: 1 h (black); 1.5 h (red); 2 h (orange); 4 h (green); 6 h (blue).

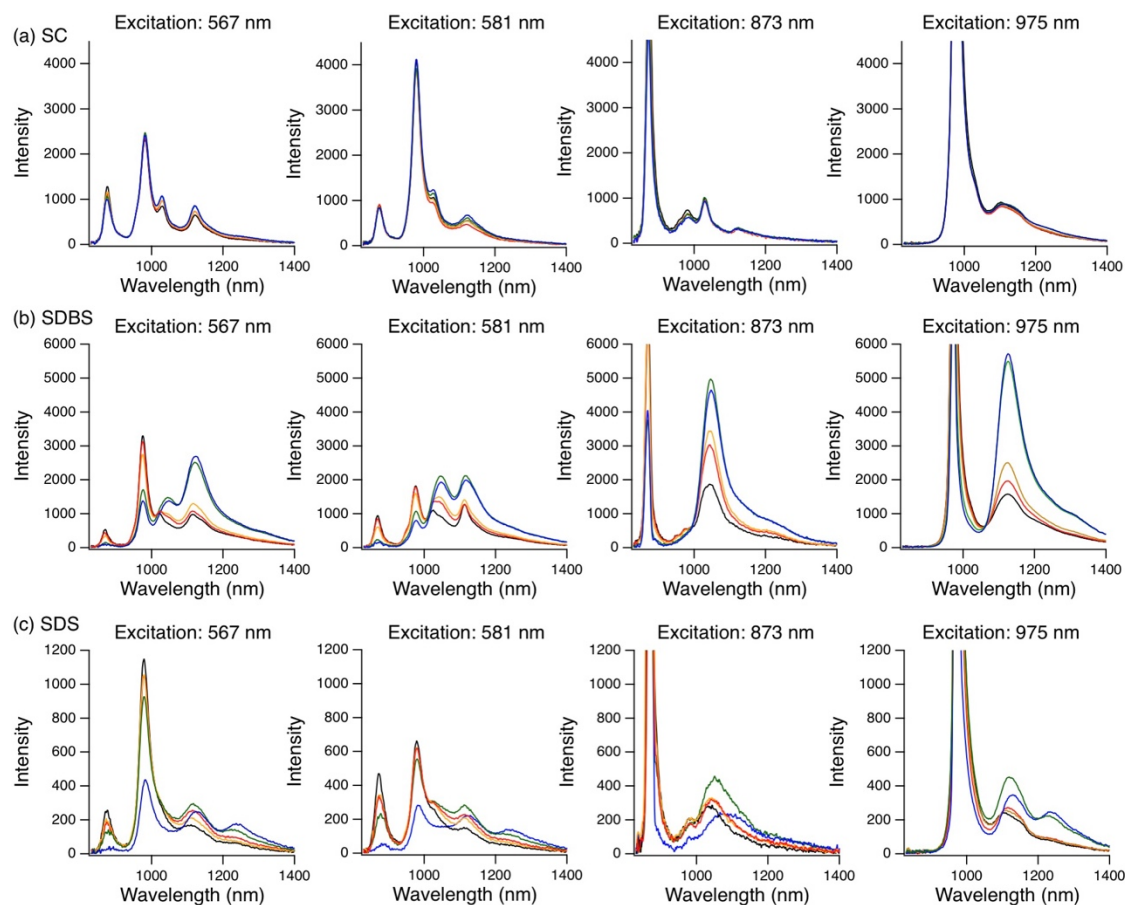

**Figure S2.** Photoluminescence (PL) spectra of SWNTs (0.0125 g/L) dispersed in a D<sub>2</sub>O solution containing 1 wt% surfactant under 567, 581, 873, and 975 nm excitation: (a) SC, (b) SDBS, (c) SDS. Sonication time: 1 h (black); 1.5 h (red); 2 h (orange); 4 h (green); 6 h (blue).

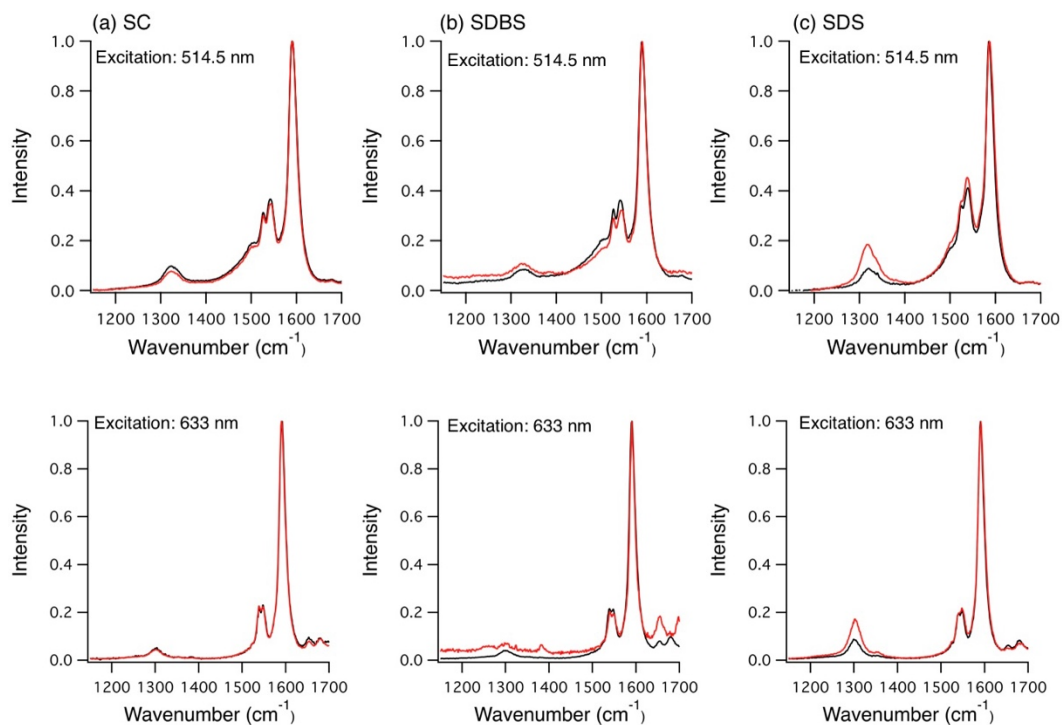

**Figure S3.** Raman spectra of SWNTs (films) after sonication in a  $D_2O$  solution containing a surfactant. Sonication time: 1 h (black); 6 h (red).

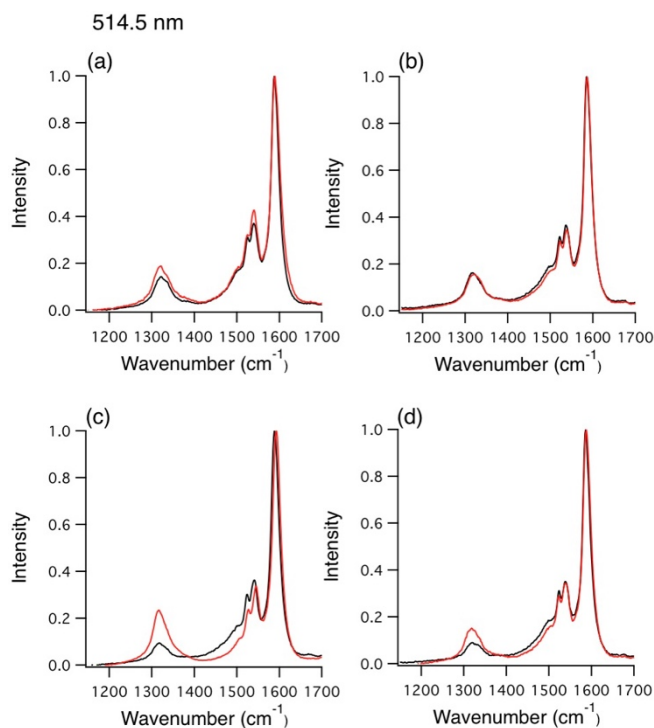

**Figure S4.** Raman spectra of SWNTs (0.01 g/L) dispersed in a  $D_2O$  solution containing 1 wt% SDBS under 514.5 nm excitation. (a) Ambient condition, (b) ambient condition with BuOH, (c) Ar atmosphere, (d) Ar atmosphere with BuOH. Black: Sonicated for 4 h, red: Sonicated for 10 h.

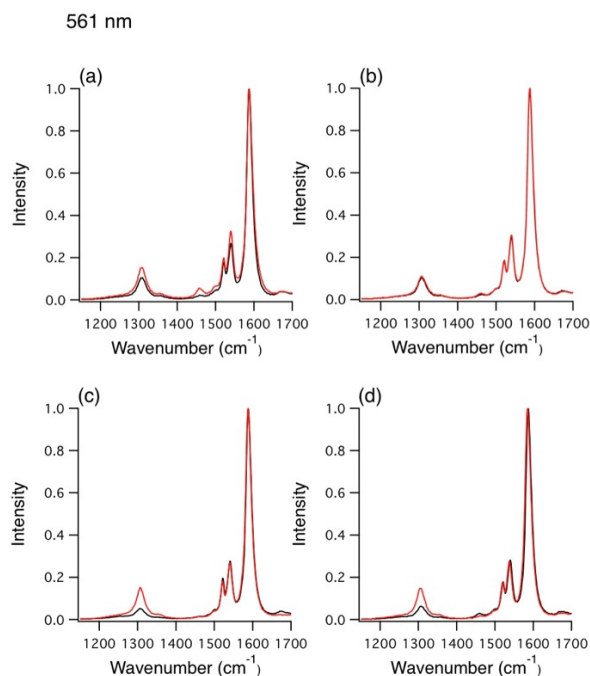

**Figure S5.** Raman spectra of SWNTs (0.01 g/L) dispersed in a D<sub>2</sub>O solution containing 1 wt% SDBS under 561 nm excitation. (a) Ambient condition, (b) ambient condition with BuOH, (c) Ar atmosphere, (d) Ar atmosphere with BuOH. Black: sonicated for 4 h, red: sonicated for 10 h.

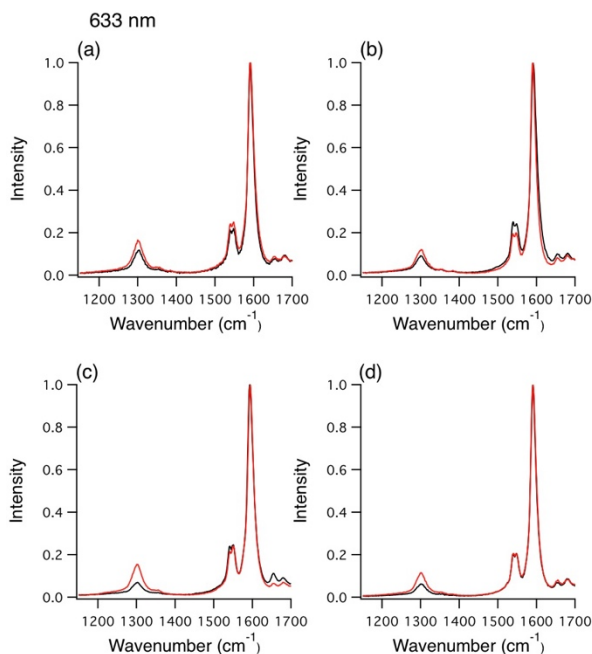

**Figure S6.** Raman spectra SWNTs (0.01 g/L) dispersed in a D<sub>2</sub>O solution containing 1 wt% SDBS under 633 nm excitation. (a) Ambient condition, (b) ambient condition with BuOH, (c) Ar atmosphere, (d) Ar atmosphere with BuOH. Black: sonicated for 4 h, red: sonicated for 10 h.

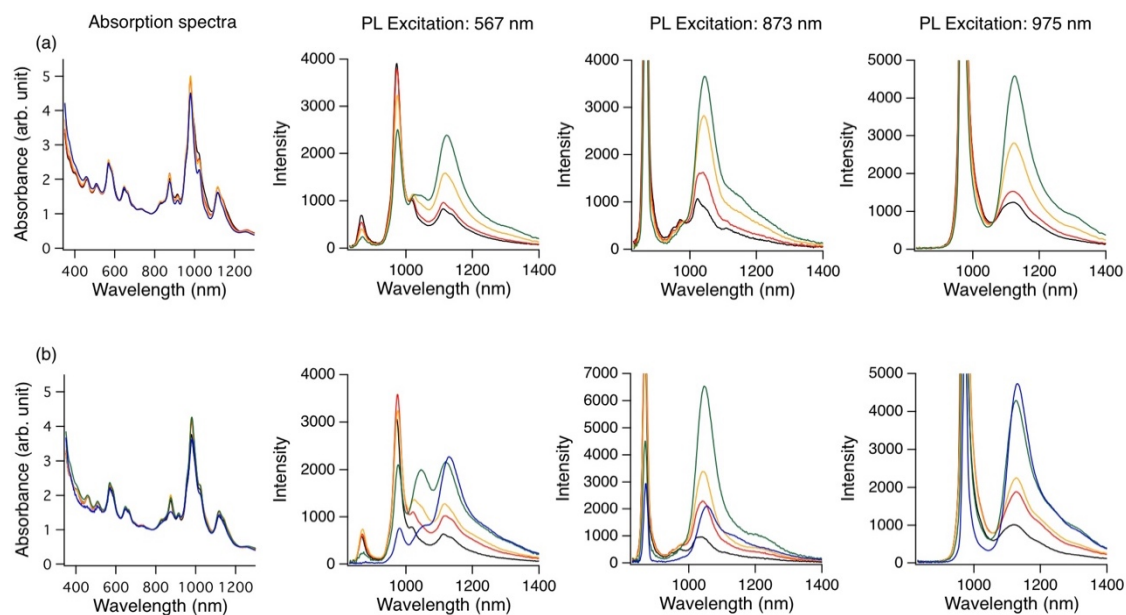

**Figure S7.** Absorption and PL spectra of SWNTs (0.01 g/L) dispersed in a D<sub>2</sub>O solution containing 1 wt% SDBS. (a) O<sub>2</sub> atmosphere and (b) ambient condition. Sonication time: 0.5 h (black); 2 h (red); 4 h (orange); 10 h (green); 46 h (blue).

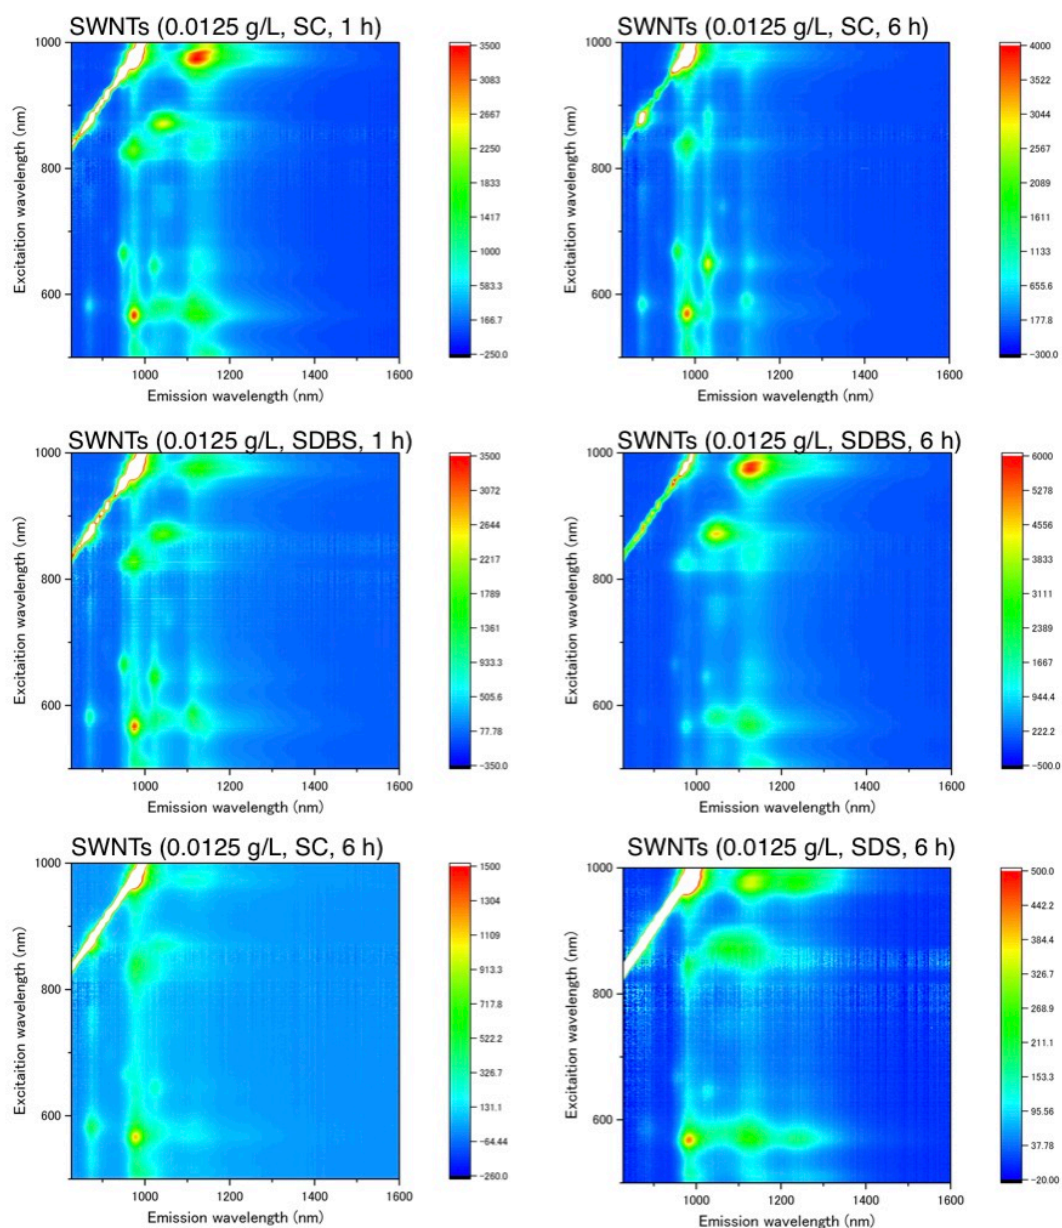

**Figure S8.** Contour plots of the fluorescence intensity versus the excitation and emission wavelength of SWNTs (0.0125 g/L) dispersed in a D<sub>2</sub>O solution containing 1 wt% surfactant under ambient condition.

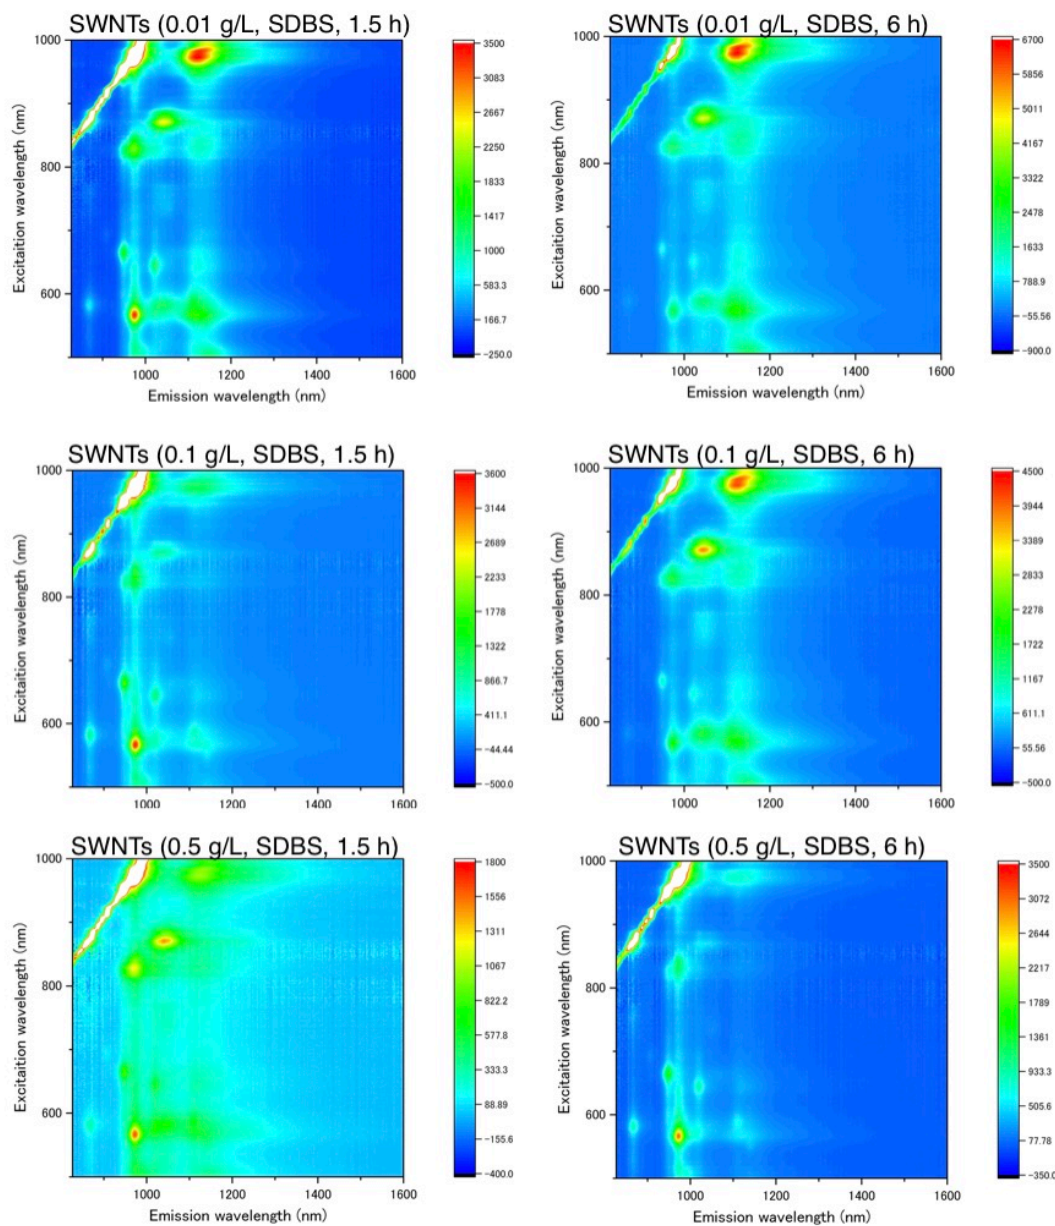

**Figure S9.** Contour plots of the fluorescence intensity versus the excitation and emission wavelength of SWNTs (0.01, 0.1, and 0.5 g/L) dispersed in a D<sub>2</sub>O solution containing 1 wt% surfactant under ambient condition.

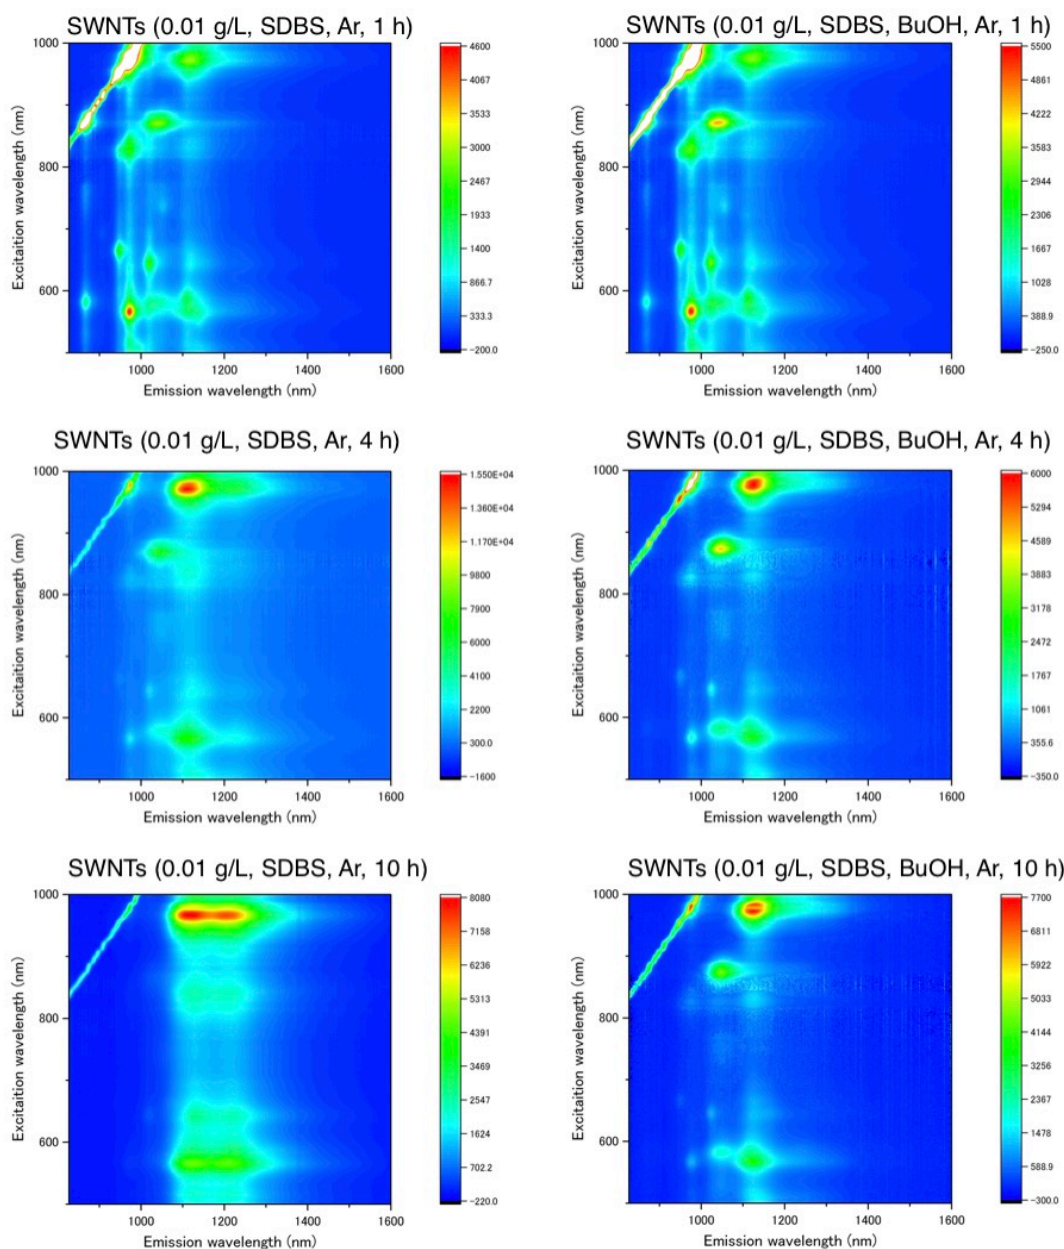

**Figure S10.** Contour plots of the fluorescence intensity versus the excitation and emission wavelength of SWNTs (0.01 g/L) dispersed in a D<sub>2</sub>O solution containing 1 wt% surfactant under Ar atmosphere with and without 1-butanol.

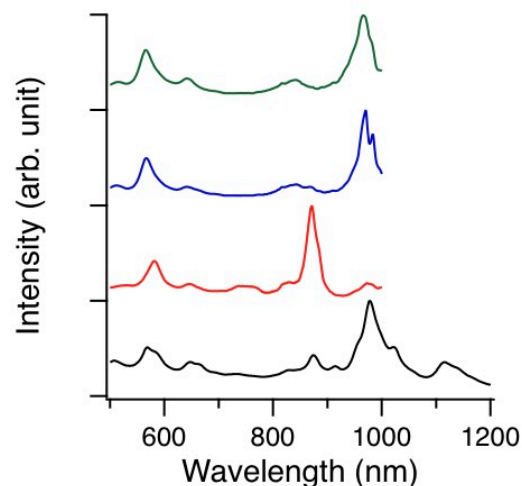

**Figure S11.** Absorption spectrum (Black: sonication time of 2 h) and excitation spectra (Red: 1044 nm, sonication time of 2 h; Blue: 1118 nm, sonication time of 4 h; Green: 1221 nm, sonication time of 10 h) of SWNTs dispersed in a  $D_2O$  solution containing 1 wt% SDBS under Ar atmosphere.

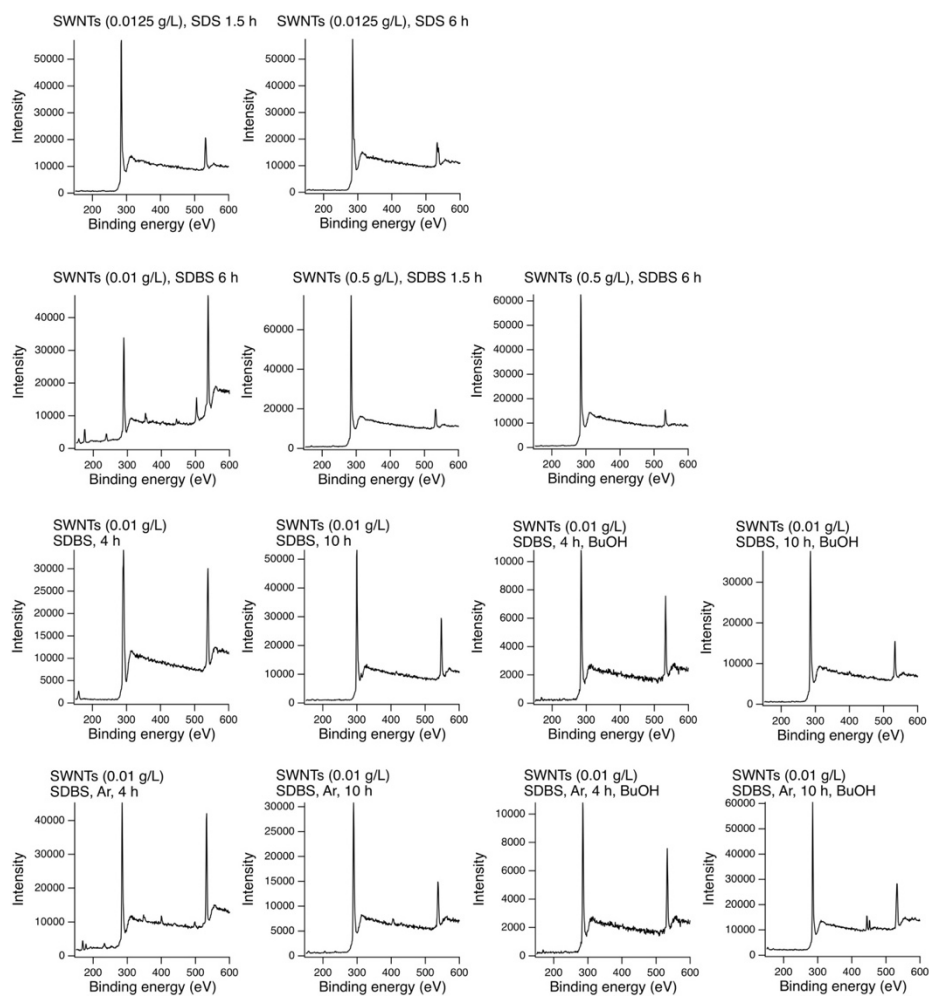

**Figure S12.** X-ray photoelectron spectra of SWNTs.

**Table S1.** Sonication condition, procedure, atomic ratio of C vs. O estimated by XPS, D/G,  $E_{11}$  absorption peak intensity of (6,5)SWNTs normalized at local minimum near 780 nm, and  $E_{11}$  PL peak intensity of (6,5)SWNTs excited at 567 nm.

|    | Surfactant | SWNTs (g/L) | Atmosphere | Sonication time (h) | Additive | Atomic ratio C1s | Atomic ratio O1s | D/G <sub>514.5</sub> | D/G <sub>561</sub> | D/G <sub>633</sub> | $E_{11}$ absorption peak | $E_{11}$ PL peak intensity | Procedure |
|----|------------|-------------|------------|---------------------|----------|------------------|------------------|----------------------|--------------------|--------------------|--------------------------|----------------------------|-----------|
| 1  | SDS        | 0.0125      | air        | 1                   |          | 0.91             | 0.09             | 0.09                 | 0.08               | 0.09               | 3.59                     | 1151                       | A         |
| 2  | SDS        | 0.0125      | air        | 6                   |          | 0.91             | 0.09             | 0.18                 | 0.14               | 0.17               | 3.18                     | 437                        | A         |
| 3  | SDBS       | 0.1         | air        | 6                   |          | 0.69             | 0.31             | -                    | -                  | -                  | 5.43                     | 2252                       | A         |
| 4  | SDBS       | 5           | air        | 1.5                 |          | 0.94             | 0.06             | 0.06                 | 0.04               | 0.05               | 5.26                     | 3098                       | A         |
| 5  | SDBS       | 5           | air        | 6                   |          | 0.95             | 0.05             | 0.06                 | 0.03               | 0.05               | 4.01                     | 1618                       | A         |
| 6  | SDBS       | 0.1         | air        | 4                   |          | 0.81             | 0.19             | 0.14                 | 0.11               | 0.12               | 4.27                     | 3246                       | B         |
| 7  | SDBS       | 0.1         | air        | 10                  |          | 0.85             | 0.15             | 0.19                 | 0.15               | 0.17               | 4.27                     | 2101                       | B         |
| 8  | SDBS       | 0.1         | air        | 20                  |          | 0.92             | 0.08             | 0.16                 | 0.10               | 0.11               | 4.25                     | 1767                       | B         |
| 9  | SDBS       | 0.1         | air        | 46                  |          | 0.92             | 0.08             | 0.16                 | 0.10               | 0.11               | 3.64                     | 758                        | B         |
| 10 | SDBS       | 0.1         | air        | 4                   | BuOH     | 0.81             | 0.19             | 0.18                 | 0.10               | 0.10               | 4.04                     | 4213                       | B         |
| 11 | SDBS       | 0.1         | air        | 10                  | BuOH     | 0.89             | 0.11             | 0.15                 | 0.11               | 0.12               | 4.02                     | 2522                       | B         |
| 12 | SDBS       | 0.1         | Ar         | 4                   |          | 0.76             | 0.24             | 0.09                 | 0.05               | 0.07               | 4.54                     | 2145                       | B         |
| 13 | SDBS       | 0.1         | Ar         | 10                  |          | 0.87             | 0.13             | 0.23                 | 0.15               | 0.16               | 2.74                     | 275                        | B         |
| 14 | SDBS       | 0.1         | Ar         | 4                   | BuOH     | 0.8              | 0.20             | 0.09                 | 0.06               | 0.06               | 5.34                     | 5042                       | B         |
| 15 | SDBS       | 0.1         | Ar         | 10                  | BuOH     | 0.86             | 0.14             | 0.15                 | 0.15               | 0.12               | 4.89                     | 1899                       | B         |
